# Supplementary material for: African Swine Fever and Its Epidemiological Course in Lithuanian Wild Boar
Source: MDPI journal article supplement (doi:10.3390/v13071276), 2021-06-30
Supplement: s1 [file s1]

Supplementary File

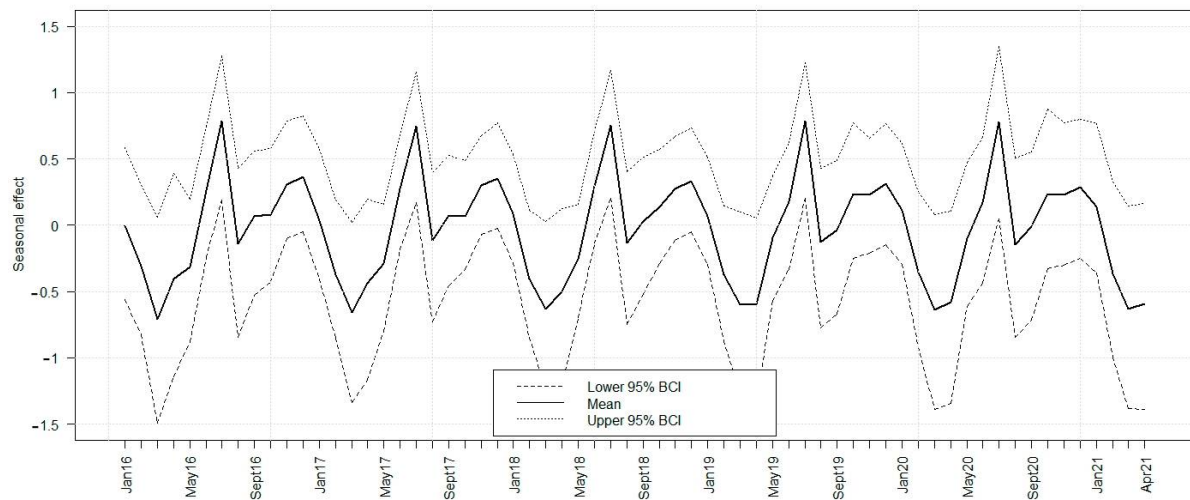

**Figure S1.** Median seasonal effect on the logit prevalence of samples obtained from hunted wild boar in Lithuania that tested PCR-positive, irrespective of the serological result. 95% Bayesian credible intervals (BCI) are indicated (dotted lines).

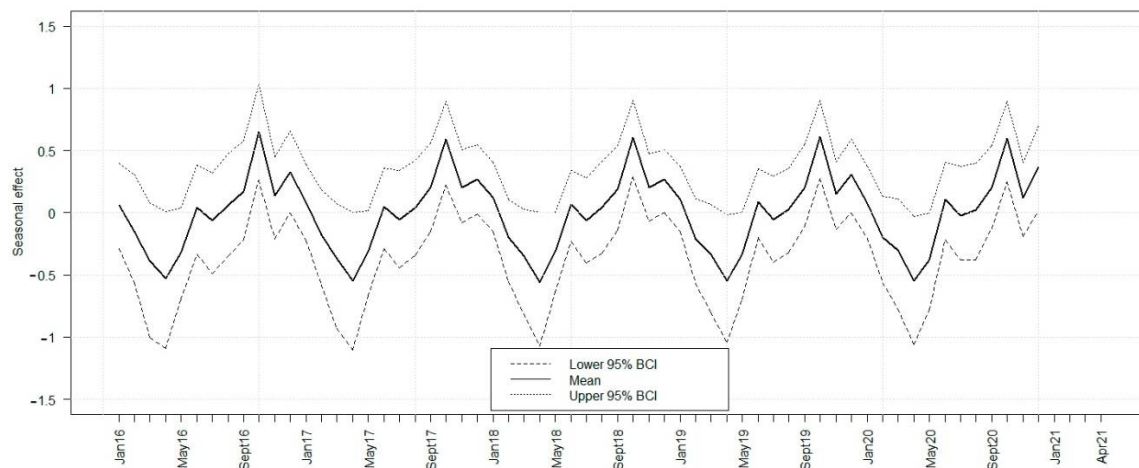

**Figure S2.** Median seasonal effect of samples that had tested exclusively serologically positive on the logit prevalence. 95% Bayesian credible intervals (BCI) are indicated (dotted lines).

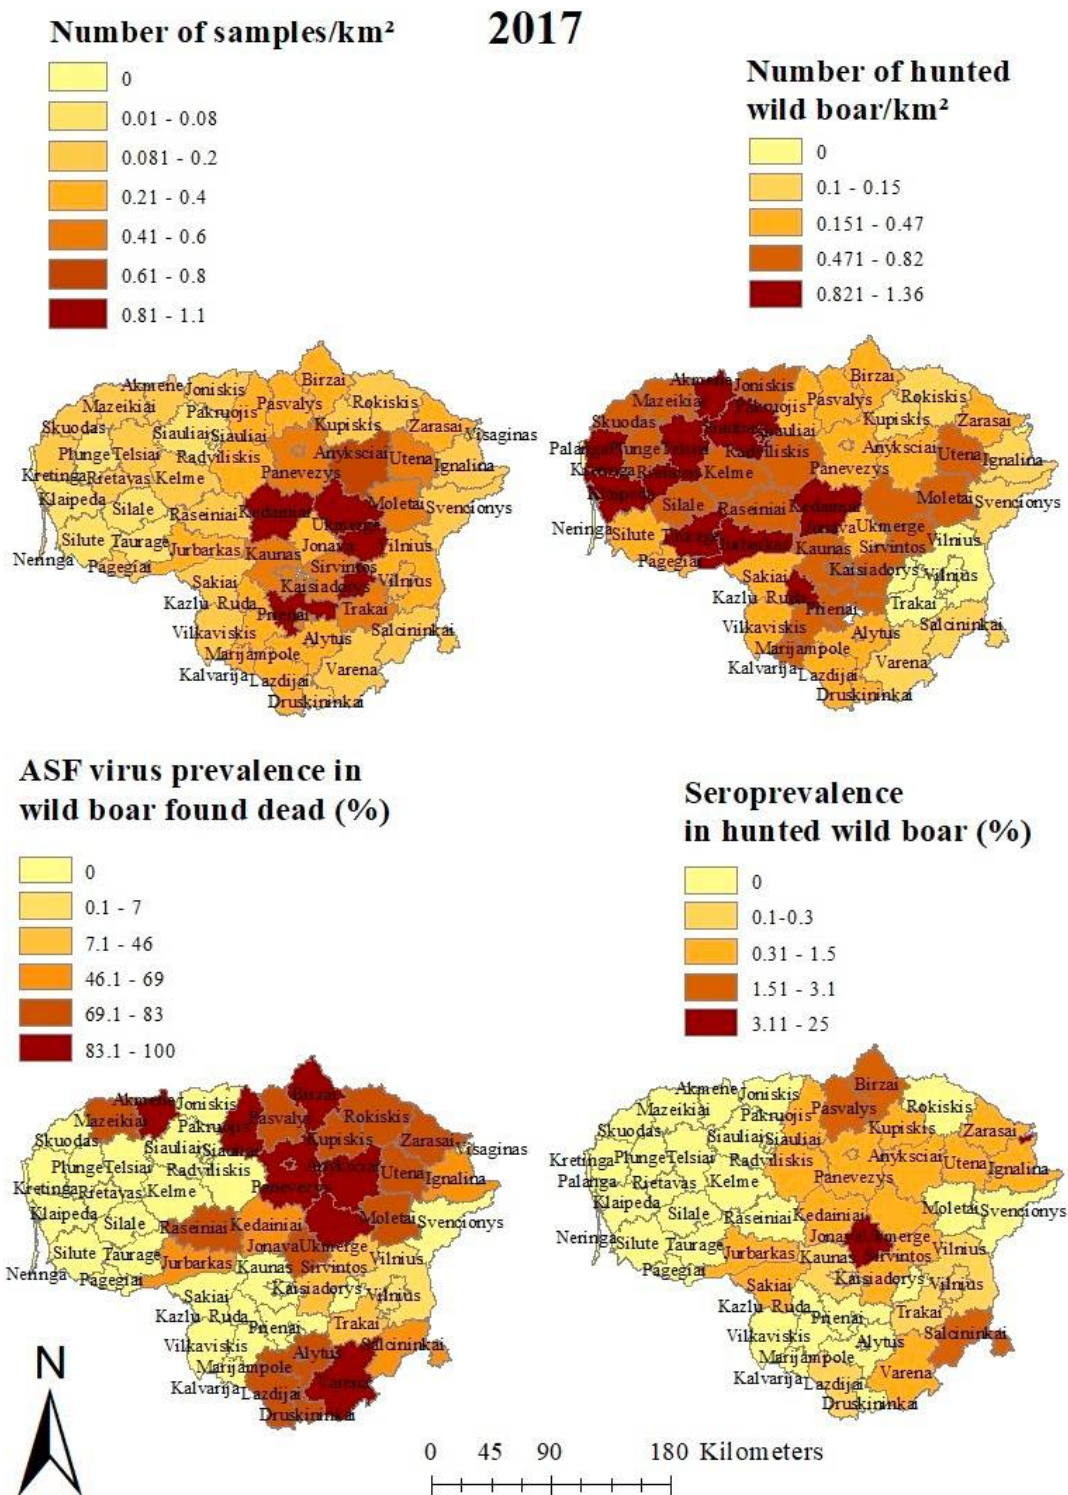

**Figure S3.** Numbers of investigated ASF samples, numbers of hunted wild boar, ASF virus prevalence estimates for wild boar found dead and seroprevalence estimates for hunted wild boar per municipality in Lithuania and in 2017.

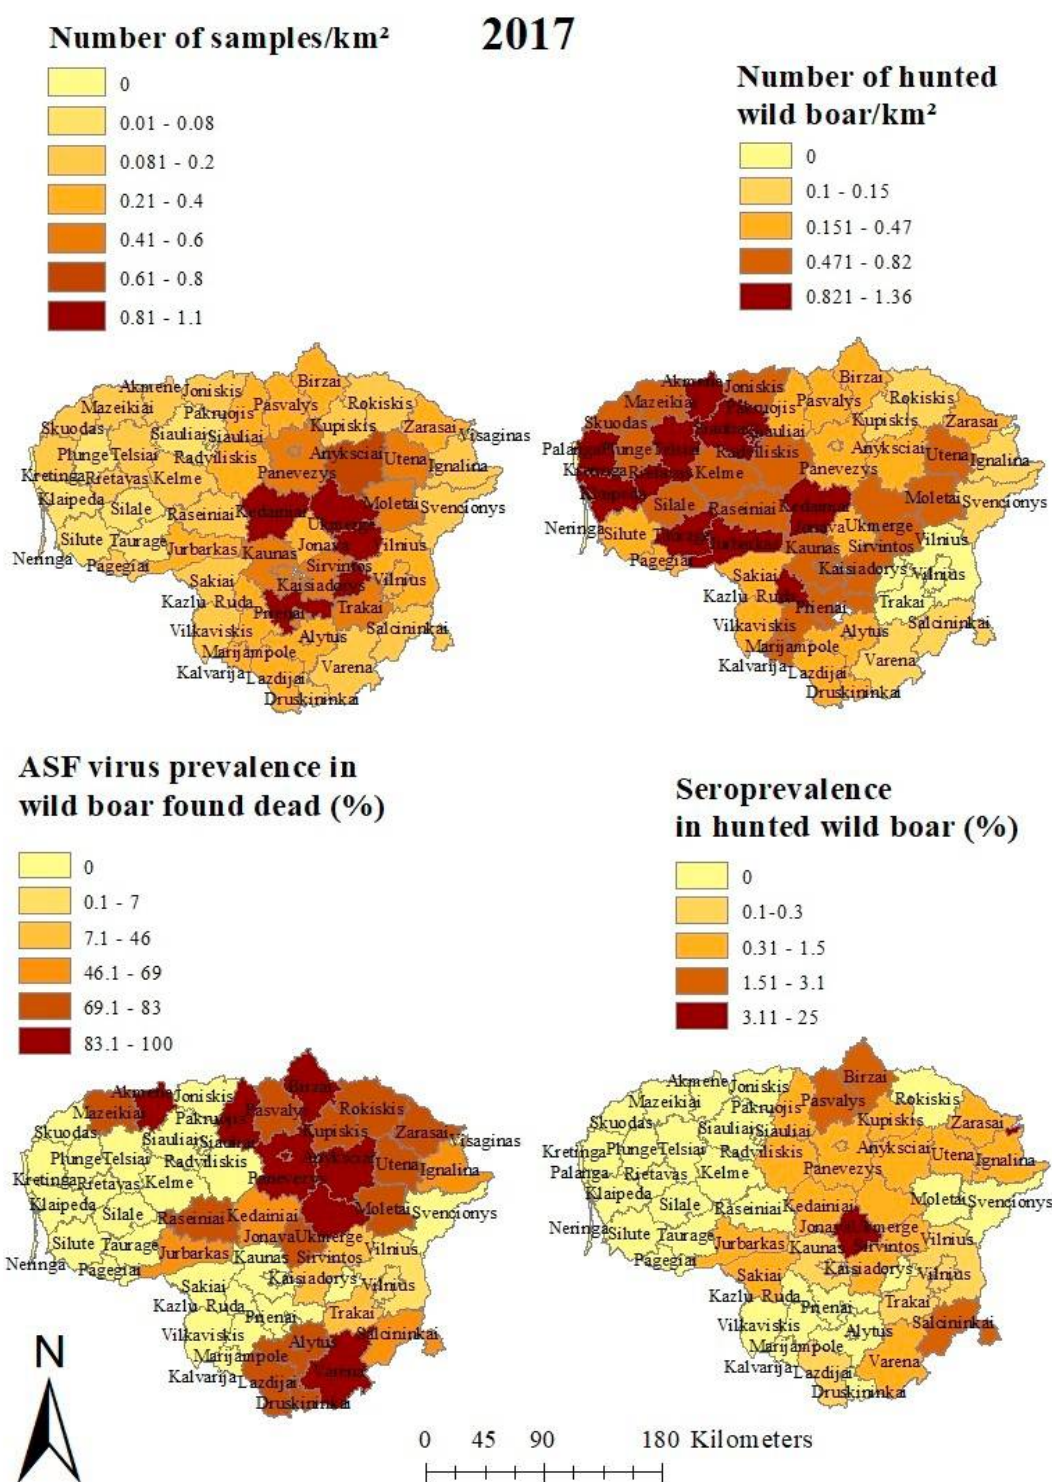

**Figure S4.** Numbers of investigated ASF samples, numbers of hunted wild boar, ASF virus prevalence estimates for wild boar found dead and seroprevalence estimates for hunted wild boar per municipality in Lithuania and in 2018.



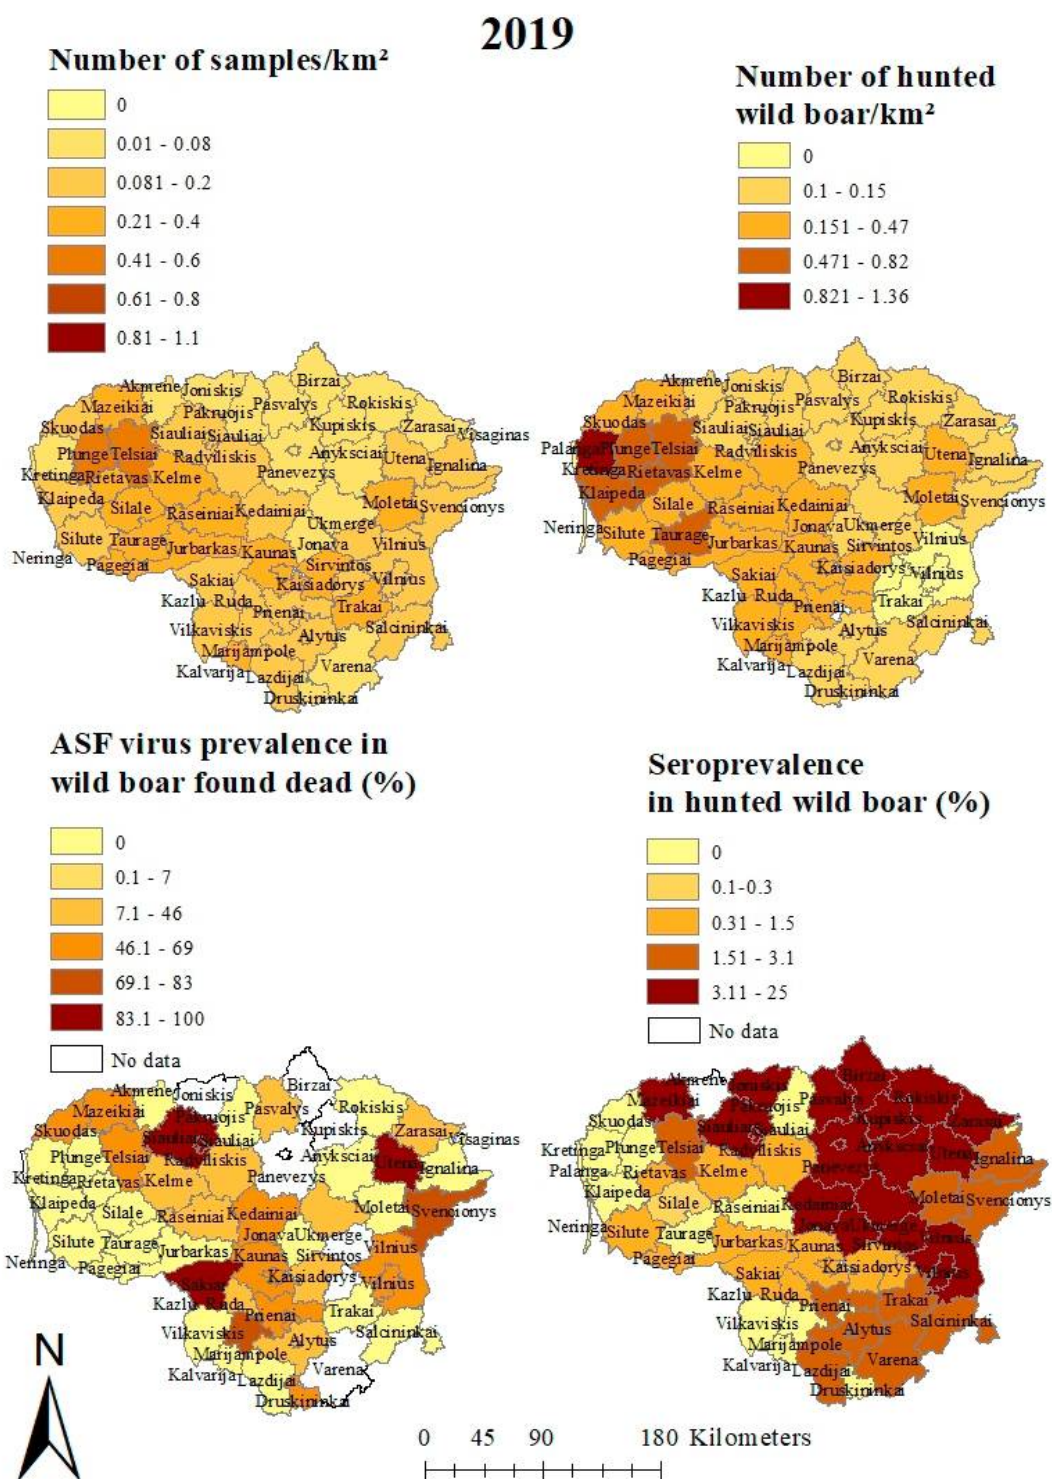

**Figure S5.** Numbers of investigated ASF samples, numbers of hunted wild boar, ASF virus prevalence estimates for wild boar found dead and seroprevalence estimates for hunted wild boar per municipality in Lithuania and in 2019.

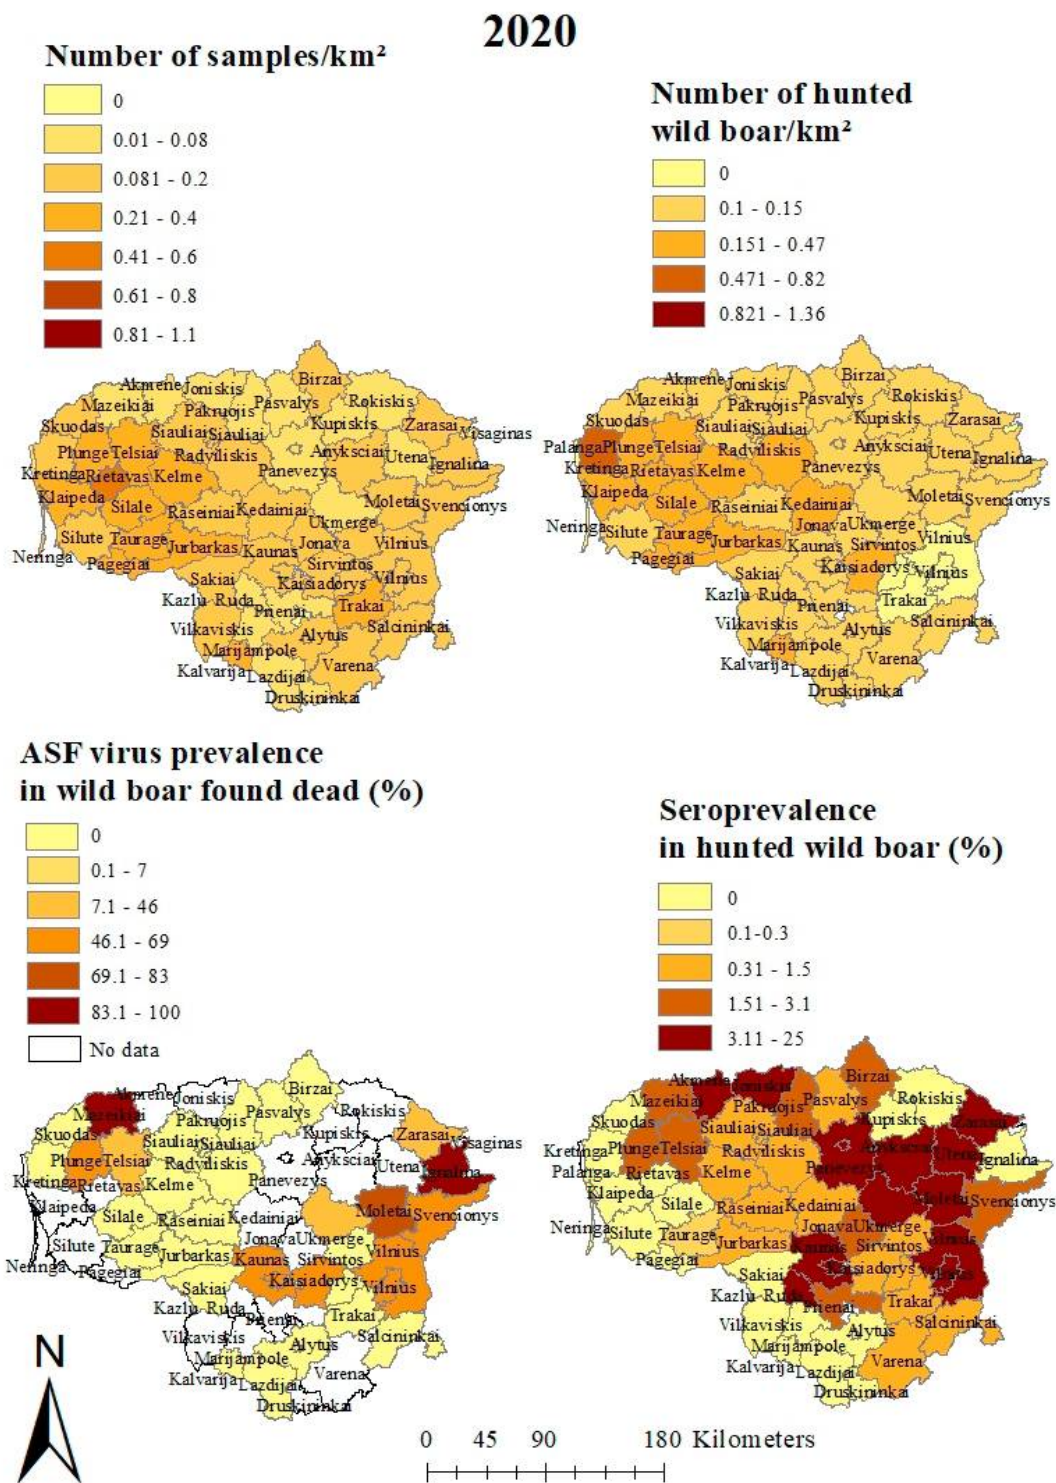

**Figure S6.** Numbers of investigated ASF samples, numbers of hunted wild boar, ASF virus prevalence estimates for wild boar found dead and seroprevalence estimates for hunted wild boar per municipality in Lithuania and in 2020.

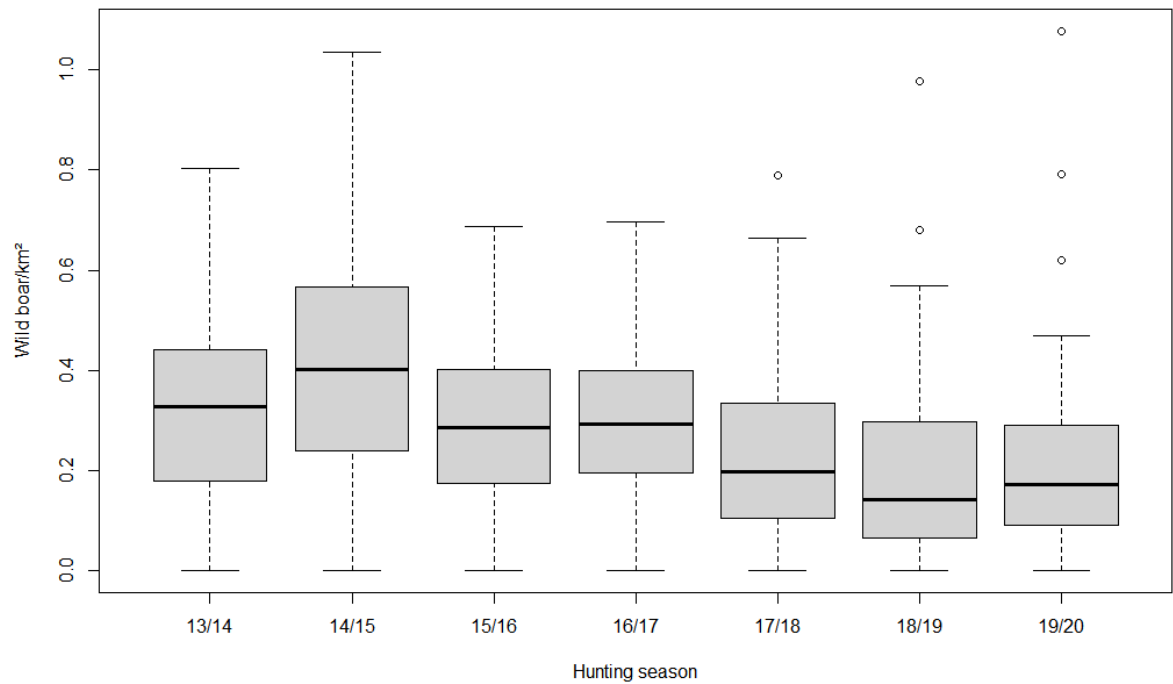

**Figure S7.** Estimated wild boar population density (wild boar/km<sup>2</sup>) based on sightings and snow tracks per hunting season. The horizontal lines that form the top of the boxes illustrate the 75th percentile. The horizontal lines that form the bottom indicate the 25th percentile. The horizontal lines that intersect the box represent the median number of wild boar per square kilometer. Whiskers indicate maximum and minimum values that are no more than 1.5 times the span of the interquartile range and the open circles represent outliers, which are single values greater or less than the extremes indicated by the whiskers.

**Table S1.** Numbers of samples originating from wild boar hunted or found dead in Lithuania per age class, year and month.

|       | Year                | 2016 |      |       | 2017 |      |       | 2018 |      |       | 2019 |      |       | 2020 |      |       | 2021 |     |       | Average total |
|-------|---------------------|------|------|-------|------|------|-------|------|------|-------|------|------|-------|------|------|-------|------|-----|-------|---------------|
| Month | Age class<br>Origin | <1   | >1   | Total | <1   | >1  | Total |               |
|       |                     |      |      |       |      |      |       |      |      |       |      |      |       |      |      |       |      |     |       |               |
| 1     | Total               | 1195 | 1922 | 3117  | 1147 | 1482 | 2629  | 543  | 1827 | 2370  | 751  | 1412 | 2163  | 572  | 500  | 1072  | 620  | 636 | 1256  | 2101          |
|       | Hunted              | 1189 | 1913 | 3102  | 1125 | 1435 | 2560  | 456  | 1609 | 2065  | 746  | 1384 | 2130  | 569  | 485  | 1054  | 618  | 632 | 1250  | 2027          |
|       | Found dead          | 6    | 9    | 15    | 22   | 47   | 69    | 87   | 218  | 305   | 5    | 28   | 33    | 3    | 15   | 18    | 2    | 4   | 6     | 74            |
| 2     | Total               | 373  | 711  | 1084  | 474  | 697  | 1171  | 461  | 1394 | 1855  | 182  | 448  | 630   | 240  | 269  | 509   | 530  | 631 | 1161  | 1068          |
|       | Hunted              | 355  | 690  | 1045  | 456  | 653  | 1109  | 398  | 1202 | 1600  | 180  | 437  | 617   | 233  | 258  | 491   | 529  | 629 | 1158  | 1003          |
|       | Found dead          | 18   | 21   | 39    | 18   | 44   | 62    | 63   | 192  | 255   | 2    | 11   | 13    | 7    | 11   | 18    | 1    | 2   | 3     | 65            |
| 3     | Total               | 123  | 541  | 664   | 123  | 275  | 398   | 281  | 1066 | 1347  | 68   | 222  | 290   | 238  | 271  | 509   | 217  | 371 | 588   | 633           |
|       | Hunted              | 104  | 517  | 621   | 116  | 238  | 354   | 228  | 934  | 1162  | 62   | 200  | 262   | 236  | 255  | 491   | 217  | 371 | 588   | 580           |
|       | Found dead          | 19   | 24   | 43    | 7    | 37   | 44    | 53   | 132  | 185   | 6    | 22   | 28    | 2    | 16   | 18    |      |     |       | 64            |
| 4     | Total               | 59   | 642  | 701   | 64   | 523  | 587   | 42   | 557  | 599   | 66   | 353  | 419   | 190  | 457  | 647   | 18   | 42  | 60    | 502           |
|       | Hunted              | 50   | 596  | 646   | 57   | 495  | 552   | 20   | 443  | 463   | 63   | 320  | 383   | 188  | 449  | 637   | 18   | 42  | 60    | 457           |
|       | Found dead          | 9    | 46   | 55    | 7    | 28   | 35    | 22   | 114  | 136   | 3    | 33   | 36    | 2    | 8    | 10    |      |     |       | 54            |
| 5     | Total               | 133  | 1838 | 1971  | 130  | 2039 | 2169  | 116  | 1323 | 1439  | 101  | 953  | 1054  | 138  | 1137 | 1275  |      |     |       | 1582          |
|       | Hunted              | 103  | 1807 | 1910  | 121  | 2013 | 2134  | 108  | 1285 | 1393  | 100  | 925  | 1025  | 138  | 1128 | 1266  |      |     |       | 1546          |
|       | Found dead          | 30   | 31   | 61    | 9    | 26   | 35    | 8    | 38   | 46    | 1    | 28   | 29    |      | 9    | 9     |      |     |       | 36            |
| 6     | Total               | 59   | 1807 | 1866  | 116  | 1975 | 2091  | 46   | 1406 | 1452  | 63   | 900  | 963   | 73   | 1076 | 1149  |      |     |       | 1504          |
|       | Hunted              | 46   | 1779 | 1825  | 87   | 1942 | 2029  | 40   | 1378 | 1418  | 58   | 886  | 944   | 73   | 1069 | 1142  |      |     |       | 1472          |
|       | Found dead          | 13   | 28   | 41    | 29   | 33   | 62    | 6    | 28   | 34    | 5    | 14   | 19    |      | 7    | 7     |      |     |       | 33            |
| 7     | Total               | 167  | 1184 | 1351  | 227  | 1385 | 1612  | 52   | 796  | 848   | 49   | 651  | 700   | 52   | 630  | 682   |      |     |       | 1039          |
|       | Hunted              | 75   | 1119 | 1194  | 111  | 1272 | 1383  | 42   | 755  | 797   | 46   | 634  | 680   | 47   | 604  | 651   |      |     |       | 941           |
|       | Found dead          | 92   | 65   | 157   | 116  | 113  | 229   | 10   | 41   | 51    | 3    | 17   | 20    | 5    | 26   | 31    |      |     |       | 98            |

|    |            |      |       |       |      |       |       |      |       |       |      |      |       |      |      |       |      |      |      |      |
|----|------------|------|-------|-------|------|-------|-------|------|-------|-------|------|------|-------|------|------|-------|------|------|------|------|
| 8  | Total      | 145  | 715   | 860   | 167  | 791   | 958   | 123  | 563   | 686   | 79   | 412  | 491   | 97   | 494  | 591   |      |      |      | 717  |
|    | Hunted     | 114  | 697   | 811   | 117  | 747   | 864   | 92   | 517   | 609   | 75   | 404  | 479   | 96   | 485  | 581   |      |      |      | 669  |
|    | Found dead | 31   | 18    | 49    | 50   | 44    | 94    | 31   | 46    | 77    | 4    | 8    | 12    | 1    | 9    | 10    |      |      |      | 48   |
| 9  | Total      | 238  | 660   | 898   | 274  | 759   | 1033  | 191  | 503   | 694   | 183  | 491  | 674   | 289  | 606  | 895   |      |      |      | 839  |
|    | Hunted     | 222  | 639   | 861   | 209  | 702   | 911   | 168  | 462   | 630   | 177  | 485  | 662   | 288  | 604  | 892   |      |      |      | 791  |
|    | Found dead | 16   | 21    | 37    | 65   | 57    | 122   | 23   | 41    | 64    | 6    | 6    | 12    | 1    | 3    | 3     |      |      |      | 48   |
| 10 | Total      | 400  | 648   | 1048  | 391  | 915   | 1306  | 344  | 632   | 976   | 406  | 594  | 1000  | 432  | 665  | 1097  |      |      |      | 1085 |
|    | Hunted     | 386  | 630   | 1016  | 311  | 840   | 1151  | 330  | 605   | 935   | 396  | 582  | 978   | 429  | 661  | 1090  |      |      |      | 1034 |
|    | Found dead | 14   | 18    | 32    | 80   | 75    | 155   | 14   | 27    | 41    | 10   | 12   | 22    | 3    | 4    | 7     |      |      |      | 51   |
| 11 | Total      | 976  | 1329  | 2305  | 617  | 1353  | 1970  | 515  | 889   | 1404  | 529  | 632  | 1161  | 579  | 599  | 1178  |      |      |      | 1604 |
|    | Hunted     | 948  | 1303  | 2251  | 506  | 1219  | 1725  | 509  | 871   | 1380  | 521  | 614  | 1135  | 576  | 599  | 1175  |      |      |      | 1533 |
|    | Found dead | 28   | 26    | 54    | 111  | 134   | 245   | 6    | 18    | 24    | 8    | 18   | 26    | 3    |      | 3     |      |      |      | 70   |
| 12 | Total      | 920  | 1125  | 2045  | 668  | 1599  | 2267  | 554  | 875   | 1429  | 626  | 728  | 1354  | 569  | 467  | 1036  |      |      |      | 1626 |
|    | Hunted     | 887  | 1115  | 2002  | 536  | 1497  | 2033  | 545  | 840   | 1385  | 615  | 714  | 1329  | 569  | 462  | 1031  |      |      |      | 1556 |
|    | Found dead | 33   | 10    | 43    | 132  | 102   | 234   | 9    | 35    | 44    | 11   | 14   | 25    |      | 5    | 5     |      |      |      | 70   |
|    | Total      | 4788 | 13122 | 17910 | 4398 | 13793 | 18191 | 3268 | 11831 | 15099 | 3103 | 7796 | 10899 | 3469 | 7171 | 10640 | 1385 | 1680 | 3065 |      |



**Table S2.** ASF virus prevalence and seroprevalence estimates for hunted wild boar and ASF virus prevalence estimates for wild boar found dead including the 95% confidence intervals on a monthly basis from January 2016 until April 2021. Blank fields indicate lack of data in the respective month.

|             | ASFV prevalence in hunted wild boar |                   |                   | ASFV prevalence in wild boar found dead |                   |                   | Seroprevalence in hunted wild boar |                   |                   |
|-------------|-------------------------------------|-------------------|-------------------|-----------------------------------------|-------------------|-------------------|------------------------------------|-------------------|-------------------|
| Study month | Prevalence in %                     | Lower 95% CI in % | Upper 95% CI in % | Prevalence in %                         | Lower 95% CI in % | Upper 95% CI in % | Prevalence in %                    | Lower 95% CI in % | Upper 95% CI in % |
| Jan 16      | 0.2                                 | 0.1               | 0.4               | 53.3                                    | 26.6              | 78.7              | 0.2                                | 0.1               | 0.5               |
| Feb 16      | 0.4                                 | 0.1               | 1.0               | 30.8                                    | 17.0              | 47.6              | 0.4                                | 0.1               | 1.0               |
| Mar16       | 0.0                                 | 0.0               | 0.6               | 39.5                                    | 25.0              | 55.6              | 0.0                                | 0.0               | 0.6               |
| Apr 16      | 0.3                                 | 0.0               | 1.2               | 21.8                                    | 11.8              | 35.0              | 0.2                                | 0.0               | 0.9               |
| May 16      | 0.1                                 | 0.0               | 0.4               | 62.3                                    | 49.0              | 74.4              | 0.1                                | 0.0               | 0.4               |
| Jun 16      | 0.2                                 | 0.1               | 0.6               | 43.9                                    | 28.5              | 60.3              | 0.2                                | 0.0               | 0.5               |
| Jul 16      | 0.6                                 | 0.2               | 1.2               | 65.6                                    | 57.6              | 73.0              | 0.2                                | 0.0               | 0.6               |
| Aug 16      | 0.1                                 | 0.0               | 0.7               | 28.6                                    | 16.6              | 43.3              | 0.6                                | 0.2               | 1.5               |
| Sep 16      | 0.2                                 | 0.0               | 0.9               | 16.2                                    | 6.2               | 32.0              | 0.5                                | 0.1               | 1.3               |
| Oct 16      | 0.4                                 | 0.1               | 1.0               | 34.4                                    | 18.6              | 53.2              | 1.2                                | 0.6               | 2.1               |
| Nov 16      | 0.4                                 | 0.2               | 0.8               | 72.2                                    | 58.4              | 83.5              | 0.3                                | 0.1               | 0.6               |
| Dec 16      | 0.5                                 | 0.2               | 0.9               | 58.1                                    | 42.1              | 73.0              | 0.6                                | 0.3               | 1.1               |
| Jan 17      | 0.3                                 | 0.1               | 0.6               | 88.4                                    | 78.4              | 94.9              | 0.2                                | 0.1               | 0.5               |
| Feb 17      | 0.1                                 | 0.0               | 0.5               | 82.3                                    | 70.5              | 90.8              | 0.1                                | 0.0               | 0.5               |
| Mar 17      | 0.3                                 | 0.0               | 1.7               | 61.4                                    | 45.5              | 75.6              | 0.0                                | 0.0               | 1.2               |
| Apr 17      | 0.4                                 | 0.0               | 1.4               | 11.4                                    | 3.2               | 26.7              | 0.2                                | 0.0               | 1.1               |
| May 17      | 0.3                                 | 0.1               | 0.6               | 37.1                                    | 21.5              | 55.1              | 0.3                                | 0.1               | 0.6               |
| Jun 17      | 0.8                                 | 0.4               | 1.3               | 50.0                                    | 37.0              | 63.0              | 0.4                                | 0.1               | 0.8               |
| Jul 17      | 1.9                                 | 1.2               | 2.8               | 83.0                                    | 77.5              | 87.6              | 0.4                                | 0.1               | 0.9               |
| Aug 17      | 1.8                                 | 1.0               | 3.0               | 70.2                                    | 59.9              | 79.2              | 0.2                                | 0.0               | 0.9               |
| Sep 17      | 2.7                                 | 1.7               | 4.0               | 68.9                                    | 59.8              | 76.9              | 1.0                                | 0.4               | 1.9               |
| Oct 17      | 2.3                                 | 1.5               | 3.4               | 68.4                                    | 60.4              | 75.6              | 0.8                                | 0.4               | 1.5               |
| Nov 17      | 3.7                                 | 2.8               | 4.7               | 83.7                                    | 78.4              | 88.1              | 1.2                                | 0.8               | 1.9               |
| Dec 17      | 3.7                                 | 2.9               | 4.6               | 82.5                                    | 77.0              | 87.1              | 1.1                                | 0.7               | 1.7               |
| Jan 18      | 2.7                                 | 2.0               | 3.5               | 87.9                                    | 83.7              | 91.3              | 1.5                                | 1.0               | 2.1               |
| Feb 18      | 1.1                                 | 0.7               | 1.8               | 82.7                                    | 77.5              | 87.2              | 1.2                                | 0.7               | 1.8               |
| Mar 18      | 0.6                                 | 0.2               | 1.2               | 76.2                                    | 69.4              | 82.2              | 0.9                                | 0.4               | 1.6               |
| Apr 18      | 0.4                                 | 0.1               | 1.6               | 72.1                                    | 63.7              | 79.4              | 0.2                                | 0.0               | 1.2               |
| May 18      | 0.9                                 | 0.5               | 1.5               | 47.8                                    | 32.9              | 63.1              | 1.0                                | 0.6               | 1.7               |
| Jun 18      | 2.5                                 | 1.7               | 3.4               | 44.1                                    | 27.2              | 62.1              | 1.6                                | 1.0               | 2.5               |
| Jul 18      | 3.0                                 | 1.9               | 4.4               | 54.9                                    | 40.3              | 68.9              | 1.3                                | 0.6               | 2.4               |
| Aug 18      | 1.1                                 | 0.5               | 2.4               | 59.7                                    | 47.9              | 70.8              | 1.7                                | 0.8               | 3.1               |
| Sep 18      | 1.3                                 | 0.5               | 2.5               | 46.9                                    | 34.3              | 59.8              | 1.6                                | 0.8               | 3.0               |
| Oct 18      | 1.3                                 | 0.7               | 2.2               | 43.9                                    | 28.5              | 60.3              | 3.1                                | 2.0               | 4.4               |
| Nov 18      | 1.3                                 | 0.8               | 2.1               | 37.5                                    | 18.8              | 59.4              | 2.3                                | 1.6               | 3.2               |
| Dec18       | 1.5                                 | 0.9               | 2.3               | 68.2                                    | 52.4              | 81.4              | 2.5                                | 1.7               | 3.4               |
| Jan 19      | 0.9                                 | 0.6               | 1.4               | 60.6                                    | 42.1              | 77.1              | 2.0                                | 1.4               | 2.6               |
| Feb 19      | 1.0                                 | 0.4               | 2.1               | 46.2                                    | 19.2              | 74.9              | 1.2                                | 0.5               | 2.4               |
| Mar 19      | 1.9                                 | 0.6               | 4.4               | 67.9                                    | 47.6              | 84.1              | 0.8                                | 0.1               | 2.8               |
| Apr 19      | 0.8                                 | 0.2               | 2.3               | 50.0                                    | 32.9              | 67.1              | 1.9                                | 0.7               | 3.8               |
| May 19      | 1.7                                 | 1.0               | 2.7               | 62.1                                    | 42.3              | 79.3              | 1.9                                | 1.2               | 3.0               |
| Jun 19      | 0.8                                 | 0.4               | 1.7               | 36.8                                    | 16.3              | 61.6              | 2.6                                | 1.7               | 3.9               |
| Jul 19      | 1.6                                 | 0.8               | 2.9               | 25.0                                    | 8.7               | 49.1              | 2.1                                | 1.2               | 3.5               |
| Aug 19      | 0.4                                 | 0.1               | 1.5               | 16.7                                    | 2.1               | 48.4              | 2.7                                | 1.5               | 4.7               |
| Sep 19      | 0.0                                 | 0.0               | 0.6               | 25.0                                    | 5.5               | 57.2              | 2.7                                | 1.6               | 4.3               |
| Oct 19      | 1.1                                 | 0.6               | 2.0               | 54.5                                    | 32.2              | 75.6              | 3.0                                | 2.0               | 4.3               |

|        |     |     |     |       |      |       |     |     |      |
|--------|-----|-----|-----|-------|------|-------|-----|-----|------|
| Nov 19 | 0.6 | 0.2 | 1.3 | 42.3  | 23.4 | 63.1  | 1.0 | 0.5 | 1.7  |
| Dec 19 | 0.8 | 0.4 | 1.5 | 28.0  | 12.1 | 49.4  | 1.4 | 0.8 | 2.1  |
| Jan 20 | 0.9 | 0.4 | 1.6 | 61.1  | 35.7 | 82.7  | 1.3 | 0.7 | 2.2  |
| Feb 20 | 0.6 | 0.1 | 1.8 | 38.9  | 17.3 | 64.3  | 1.2 | 0.5 | 2.6  |
| Mar 20 | 0.0 | 0.0 | 0.7 | 50.0  | 26.0 | 74.0  | 1.4 | 0.6 | 2.9  |
| Apr 20 | 0.2 | 0.0 | 0.9 | 50.0  | 18.7 | 81.3  | 1.1 | 0.4 | 2.3  |
| May 20 | 0.1 | 0.0 | 0.4 | 62.5  | 24.5 | 91.5  | 0.8 | 0.4 | 1.5  |
| Jun 20 | 0.0 | 0.0 | 0.3 | 14.3  | 0.4  | 57.9  | 1.8 | 1.1 | 2.7  |
| Jul 20 | 0.0 | 0.0 | 0.6 | 41.9  | 24.5 | 60.9  | 2.0 | 1.1 | 3.5  |
| Aug 20 | 0.0 | 0.0 | 0.6 | 30.0  | 6.7  | 65.2  | 1.2 | 0.5 | 2.5  |
| Sep 20 | 0.2 | 0.0 | 0.8 | 25.0  | 0.6  | 80.6  | 1.4 | 0.7 | 2.4  |
| Oct 20 | 0.2 | 0.0 | 0.7 | 0.0   | 0.0  | 41.0  | 1.8 | 1.1 | 2.8  |
| Nov 20 | 0.1 | 0.0 | 0.5 | 0.0   | 0.0  | 70.8  | 1.0 | 0.5 | 1.8  |
| Dec 20 | 0.0 | 0.0 | 0.4 | 100.0 | 47.8 | 100.0 | 1.8 | 1.1 | 2.9  |
| Jan 21 | 0.1 | 0.0 | 0.4 | 50.0  | 11.8 | 88.2  | 1.0 | 0.5 | 1.7  |
| Feb 21 | 0.0 | 0.0 | 0.3 | 33.3  | 0.8  | 90.6  | 1.2 | 0.7 | 2.0  |
| Mar 21 | 0.0 | 0.0 | 0.6 |       | 0.0  | 100.0 | 1.7 | 0.8 | 3.1  |
| Apr 21 | 0.0 | 0.0 | 7.4 |       | 0.0  | 100.0 | 2.1 | 0.1 | 11.1 |

**Table S3.** ASF virus prevalence of hunted wild boar including the 95% confidence intervals on municipality level in the years 2016 – 2021 (only the first 4 months for 2021). Blank fields indicate lack of data in the respective municipality.

|              | 2016      |            |            | 2017      |            |            | 2018      |            |            | 2019      |            |            | 2020      |            |            | 2021      |            |            |
|--------------|-----------|------------|------------|-----------|------------|------------|-----------|------------|------------|-----------|------------|------------|-----------|------------|------------|-----------|------------|------------|
| District     | Prev in % | Lo CI in % | Up CI in % | Prev in % | Lo CI in % | Up CI in % | Prev in % | Lo CI in % | Up CI in % | Prev in % | Lo CI in % | Up CI in % | Prev in % | Lo CI in % | Up CI in % | Prev in % | Lo CI in % | Up CI in % |
| Akmene       | 0         | 0          | 5.8        | 0         | 0          | 24.7       | 10.6      | 6.3        | 16.5       | 0.0       | 0.0        | 10.9       | 0.0       | 0.0        | 12.8       | 0.0       | 0.0        | 33.6       |
| Alytus       | 0         | 0          | 0.7        | 0.9       | 0.2        | 2.2        | 2.6       | 1          | 5.5        | 1.6       | 0.2        | 5.7        | 0.0       | 0.0        | 2.1        | 0.0       | 0.0        | 4.7        |
| Anyksciai    | 0.9       | 0.5        | 1.6        | 4.8       | 3.2        | 7.0        | 4         | 0.8        | 11.2       | 0.0       | 0.0        | 3.3        | 0.0       | 0.0        | 1.5        | 0.0       | 0.0        | 4.2        |
| Birstonas    | 0         | 0          | 7.3        | 0         | 0          | 7.0        | 0         | 0          | 7.1        | 0.0       | 0.0        | 33.6       | 0.0       | 0.0        | 60.2       |           | 0.0        | 100.0      |
| Birzai       | 0.9       | 0.3        | 2          | 3.7       | 1.9        | 6.6        | 3.6       | 0.7        | 10.1       | 0.0       | 0.0        | 3.9        | 0.0       | 0.0        | 1.9        | 0.0       | 0.0        | 4.1        |
| Druskininkai | 0         | 0          | 8          | 0         | 0          | 5.6        | 0         | 0          | 24.7       | 0.0       | 0.0        | 52.2       | 0.0       | 0.0        | 70.8       | 0.0       | 0.0        | 52.2       |
| Elektrenai   | 0         | 0          | 0.8        | 0.5       | 0.1        | 1.7        | 3.3       | 1.6        | 6.1        | 0.0       | 0.0        | 4.1        | 0.0       | 0.0        | 3.3        | 0.0       | 0.0        | 12.8       |
| Ignalina     | 4.4       | 1.6        | 9.4        | 0.9       | 0          | 5.0        | 0         | 0          | 2.4        | 2.2       | 0.5        | 6.4        | 1.1       | 0.1        | 4.0        | 0.0       | 0.0        | 5.7        |
| Jonava       | 0.8       | 0.2        | 1.8        | 3.6       | 1.6        | 6.9        | 0         | 0          | 6.6        | 0.0       | 0.0        | 5.5        | 0.0       | 0.0        | 2.9        | 0.0       | 0.0        | 16.8       |
| Joniskis     | 0         | 0          | 2.6        | 0         | 0          | 4.3        | 2.5       | 0.9        | 5.3        | 1.3       | 0.0        | 7.0        | 0.0       | 0.0        | 5.7        | 0.0       | 0.0        | 21.8       |
| Jurbarkas    | 0         | 0          | 3.9        | 4.8       | 2.6        | 7.9        | 2.7       | 1.4        | 4.6        | 0.0       | 0.0        | 1.1        | 0.0       | 0.0        | 1.0        | 0.0       | 0.0        | 4.6        |
| Kaisiadorys  | 0.2       | 0          | 0.9        | 0.5       | 0.1        | 1.4        | 1.8       | 0.8        | 3.3        | 2.5       | 1.1        | 4.9        | 0.4       | 0.0        | 2.2        | 0.0       | 0.0        | 7.5        |
| Kalvarija    | 0         | 0          | 5.5        | 0         | 0          | 2.5        | 0         | 0          | 2          | 0.0       | 0.0        | 2.1        | 0.0       | 0.0        | 2.0        | 0.0       | 0.0        | 6.5        |
| Kaunas       | 0.1       | 0          | 0.8        | 0.2       | 0          | 0.8        | 1         | 0.5        | 2          | 7.8       | 5.3        | 11.0       | 0.6       | 0.0        | 3.1        | 0.0       | 0.0        | 8.0        |
| Kazlu Ruda   | 0         | 0          | 4.9        | 0         | 0          | 2.1        | 0         | 0          | 1.2        | 2.1       | 0.3        | 7.3        | 0.0       | 0.0        | 21.8       | 0.0       | 0.0        | 41.0       |
| Kedainiai    | 0.2       | 0          | 0.5        | 2.2       | 1.5        | 2.9        | 1.9       | 1          | 3.5        | 0.0       | 0.0        | 1.1        | 0.0       | 0.0        | 1.0        | 0.0       | 0.0        | 4.2        |
| Kelme        | 0         | 0          | 3.2        | 0         | 0          | 2.5        | 0.2       | 0          | 1          | 0.3       | 0.0        | 1.1        | 0.0       | 0.0        | 0.6        | 0.0       | 0.0        | 2.0        |
| Klaipeda     | 0         | 0          | 6.4        | 0         | 0          | 10.0       | 0         | 0          | 11.2       | 0.0       | 0.0        | 2.1        | 0.0       | 0.0        | 0.9        | 0.0       | 0.0        | 3.1        |
| Kretinga     | 0         | 0          | 3.7        | 0         | 0          | 4.1        | 0         | 0          | 5.3        | 0.0       | 0.0        | 5.1        | 0.0       | 0.0        | 1.9        | 0.0       | 0.0        | 2.7        |
| Kupiskis     | 0         | 0          | 1.1        | 1.5       | 0.2        | 5.3        | 3.2       | 0.4        | 11         | 0.0       | 0.0        | 9.7        | 0.0       | 0.0        | 5.1        | 0.0       | 0.0        | 14.2       |
| Lazdijai     | 0.2       | 0          | 1.2        | 2         | 0.9        | 3.7        | 3         | 1.2        | 6.1        | 1.7       | 0.2        | 6.1        | 0.0       | 0.0        | 3.5        | 0.0       | 0.0        | 13.2       |
| Marijampole  | 0         | 0          | 3.2        | 0         | 0          | 1.6        | 0.3       | 0          | 1.8        | 1.6       | 0.2        | 5.6        | 0.0       | 0.0        | 8.6        | 0.0       | 0.0        | 33.6       |
| Mazeikiai    | 0         | 0          | 4          | 0         | 0          | 6.1        | 0.6       | 0.1        | 1.7        | 3.1       | 1.6        | 5.5        | 2.5       | 0.5        | 7.1        | 0.0       | 0.0        | 18.5       |
| Moletai      | 0.3       | 0          | 1.2        | 1.1       | 0.4        | 2.2        | 1         | 0.3        | 2.4        | 1.7       | 0.5        | 3.9        | 1.0       | 0.1        | 3.6        | 0.0       | 0.0        | 7.3        |
| Neringa      | 0         | 0          | 21.8       | 0         | 0          | 97.5       | 0         | 0          | 11.2       | 0.0       | 0.0        | 3.5        | 0.0       | 0.0        | 26.5       |           | 0.0        | 100.0      |
| Pagegiai     | 0         | 0          | 6          | 0         | 0          | 5.4        | 0         | 0          | 4.7        | 0.0       | 0.0        | 2.4        | 0.0       | 0.0        | 2.3        | 0.0       | 0.0        | 11.6       |
| Pakruojis    | 0         | 0          | 11.9       | 3.6       | 1.3        | 7.6        | 6.8       | 3.7        | 11.3       | 0.0       | 0.0        | 5.3        | 0.0       | 0.0        | 6.3        | 0.0       | 0.0        | 17.6       |
| Palanga      | 0         | 0          | 97.5       | 0         | 0          | 84.2       | 0         | 0          | 97.5       | 0.0       | 0.0        | 84.2       |           | 0.0        | 100.0      |           | 0.0        | 100.0      |

|             |     |     |      |     |     |      |      |     |      |     |     |       |     |     |       |     |     |      |
|-------------|-----|-----|------|-----|-----|------|------|-----|------|-----|-----|-------|-----|-----|-------|-----|-----|------|
| Panevezys   | 0.9 | 0.4 | 1.9  | 4.1 | 2.8 | 5.7  | 14.3 | 7.1 | 24.7 | 0.0 | 0.0 | 5.4   | 1.1 | 0.0 | 6.2   | 0.0 | 0.0 | 15.4 |
| Pasvalys    | 0   | 0   | 2.9  | 4.8 | 2.3 | 8.6  | 0    | 0   | 4.5  | 0.0 | 0.0 | 5.1   | 0.0 | 0.0 | 3.7   | 0.0 | 0.0 | 8.8  |
| Plunge      | 0   | 0   | 4.1  | 0   | 0   | 6.3  | 0    | 0   | 2    | 0.2 | 0.0 | 1.0   | 0.4 | 0.1 | 1.6   | 1.3 | 0.0 | 6.8  |
| Prienai     | 0   | 0   | 0.5  | 0   | 0   | 0.5  | 1.3  | 0.6 | 2.5  | 2.8 | 0.9 | 6.5   | 0.0 | 0.0 | 3.7   | 0.0 | 0.0 | 26.5 |
| Radviliskis | 0   | 0   | 4.2  | 1.9 | 0.7 | 4.1  | 1.7  | 0.9 | 3.1  | 0.0 | 0.0 | 1.3   | 0.0 | 0.0 | 1.1   | 0.0 | 0.0 | 3.3  |
| Raseiniai   | 0   | 0   | 3.9  | 0   | 0   | 2.2  | 0.8  | 0.2 | 2    | 0.0 | 0.0 | 1.0   | 0.0 | 0.0 | 1.3   | 0.0 | 0.0 | 3.7  |
| Rietavas    | 0   | 0   | 5.8  | 0   | 0   | 11.9 | 0    | 0   | 4.8  | 0.0 | 0.0 | 1.6   | 0.0 | 0.0 | 1.1   | 0.0 | 0.0 | 5.6  |
| Rokiskis    | 0.8 | 0.2 | 2    | 3.5 | 1.6 | 6.5  | 2.7  | 0.3 | 9.5  | 0.0 | 0.0 | 3.3   | 0.0 | 0.0 | 2.9   | 0.0 | 0.0 | 4.7  |
| Sakiai      | 0   | 0   | 17.6 | 0   | 0   | 2.9  | 3.1  | 1.7 | 5.3  | 2.3 | 0.9 | 5.0   | 0.0 | 0.0 | 2.7   | 0.0 | 0.0 | 5.3  |
| Salcininkai | 0   | 0   | 1.6  | 1.3 | 0.2 | 4.7  | 0    | 0   | 2.8  | 0.7 | 0.0 | 3.8   | 0.0 | 0.0 | 2.3   | 0.0 | 0.0 | 9.7  |
| Siauliai    | 0   | 0   | 3    | 0   | 0   | 2.8  | 2.5  | 1.1 | 4.9  | 1.3 | 0.3 | 3.7   | 0.0 | 0.0 | 1.4   | 0.0 | 0.0 | 4.3  |
| Silale      | 0   | 0   | 5.6  | 0   | 0   | 9.7  | 0    | 0   | 1.4  | 0.0 | 0.0 | 0.8   | 0.0 | 0.0 | 0.9   | 0.0 | 0.0 | 2.7  |
| Silute      | 0   | 0   | 7.5  | 0   | 0   | 16.1 | 0    | 0   | 3.1  | 0.0 | 0.0 | 1.3   | 0.0 | 0.0 | 0.9   | 0.0 | 0.0 | 3.2  |
| Sirvintos   | 0   | 0   | 0.6  | 2.2 | 1.1 | 3.8  | 1.2  | 0   | 6.7  | 1.2 | 0.0 | 6.3   | 0.0 | 0.0 | 2.6   | 0.0 | 0.0 | 10.3 |
| Skuodas     | 0   | 0   | 5.1  | 0   | 0   | 3.8  | 0    | 0   | 4.7  | 0.0 | 0.0 | 2.4   | 2.2 | 0.3 | 7.6   | 0.0 | 0.0 | 14.2 |
| Svencionys  | 0   | 0   | 2.1  | 0.7 | 0   | 3.7  | 0.5  | 0   | 2.9  | 0.5 | 0.0 | 2.7   | 0.6 | 0.0 | 3.4   | 0.0 | 0.0 | 9.5  |
| Taurage     | 0   | 0   | 4.5  | 0   | 0   | 8.8  | 0.4  | 0   | 2.3  | 0.0 | 0.0 | 0.8   | 0.0 | 0.0 | 0.8   | 0.0 | 0.0 | 3.2  |
| Telsiai     | 0   | 0   | 3    | 0   | 0   | 2.9  | 0.8  | 0.3 | 1.7  | 1.1 | 0.5 | 2.1   | 0.4 | 0.0 | 1.3   | 0.0 | 0.0 | 1.8  |
| Trakai      | 0   | 0   | 0.7  | 0.3 | 0   | 1.1  | 1.8  | 0.8 | 3.4  | 0.6 | 0.1 | 2.3   | 0.0 | 0.0 | 1.0   | 0.0 | 0.0 | 4.4  |
| Ukmerge     | 0   | 0   | 0.5  | 2.5 | 1.5 | 3.7  | 5.3  | 1.5 | 12.9 | 0.0 | 0.0 | 6.3   | 0.0 | 0.0 | 3.0   | 0.0 | 0.0 | 9.5  |
| Utena       | 0   | 0   | 0.5  | 1.3 | 0.5 | 2.5  | 1.4  | 0.4 | 3.5  | 0.6 | 0.0 | 3.3   | 0.0 | 0.0 | 2.9   | 0.0 | 0.0 | 14.2 |
| Varena      | 0.3 | 0   | 1.7  | 1.6 | 0.5 | 3.6  | 2.2  | 0.6 | 5.4  | 0.0 | 0.0 | 3.0   | 0.0 | 0.0 | 1.3   | 0.0 | 0.0 | 5.9  |
| Vilkaviskis | 0   | 0   | 4.6  | 0.5 | 0   | 2.9  | 0    | 0   | 1.6  | 0.0 | 0.0 | 1.7   | 0.0 | 0.0 | 1.9   | 0.0 | 0.0 | 9.7  |
| Vilnius     | 0.2 | 0   | 0.8  | 0.3 | 0   | 1.0  | 1.1  | 0.5 | 2.4  | 1.7 | 0.5 | 3.8   | 0.4 | 0.0 | 2.1   | 0.0 | 0.0 | 4.9  |
| Visaginas   |     | 0   | 100  | 0   | 0   | 60.2 |      | 0   | 100  |     | 0.0 | 100.0 |     | 0.0 | 100.0 | 0.0 | 0.0 | 97.5 |
| Zarasai     | 0.2 | 0   | 1.1  | 2.3 | 1   | 4.3  | 3.3  | 1.1 | 7.5  | 0.0 | 0.0 | 3.9   | 0.8 | 0.0 | 4.3   | 0.0 | 0.0 | 6.7  |

**Table S4.** ASF virus prevalence for wild boar found dead including the 95% confidence intervals on municipality level in the years 2016 - 2021 (only the first 4 months for 2021). Blank fields indicate lack of data in the respective municipality.

|          | 2016      |            |            | 2017      |            |            | 2018      |            |            | 2019      |            |            | 2020      |            |            | 2021      |            |            |
|----------|-----------|------------|------------|-----------|------------|------------|-----------|------------|------------|-----------|------------|------------|-----------|------------|------------|-----------|------------|------------|
| District | Prev in % | Lo CI in % | Up CI in % | Prev in % | Lo CI in % | Up CI in % | Prev in % | Lo CI in % | Up CI in % | Prev in % | Lo CI in % | Up CI in % | Prev in % | Lo CI in % | Up CI in % | Prev in % | Lo CI in % | Up CI in % |
| Akmene   |           | 0.0        | 100.0      | 100.0     | 2.5        | 100.0      | 76.7      | 66.4       | 85.2       | 0.0       | 0.0        | 97.5       |           | 0.0        | 100.0      |           | 0          | 100        |



|              |      |      |       |      |      |       |       |      |       |      |      |       |       |      |       |       |      |     |
|--------------|------|------|-------|------|------|-------|-------|------|-------|------|------|-------|-------|------|-------|-------|------|-----|
| Alytus       | 0.0  | 0.0  | 45.9  | 76.9 | 56.4 | 91.0  | 72.7  | 54.5 | 86.7  | 33.3 | 0.8  | 90.6  | 0.0   | 0.0  | 97.5  |       | 0    | 100 |
| Anyksciai    | 79.3 | 69.6 | 87.1  | 89.2 | 82.8 | 93.8  | 25.0  | 0.6  | 80.6  | 0.0  | 0.0  | 84.2  |       | 0.0  | 100.0 |       | 0    | 100 |
| Birstonas    | 0.0  | 0.0  | 97.5  |      | 0.0  | 100.0 | 100.0 | 2.5  | 100.0 | 50.0 | 1.3  | 98.7  |       | 0.0  | 100.0 |       | 0    | 100 |
| Birzai       | 62.1 | 42.3 | 79.3  | 92.6 | 84.6 | 97.2  | 41.7  | 15.2 | 72.3  |      | 0.0  | 100.0 | 0.0   | 0.0  | 97.5  |       | 0    | 100 |
| Druskininkai | 0.0  | 0.0  | 97.5  | 75.0 | 19.4 | 99.4  | 0.0   | 0.0  | 97.5  | 50.0 | 1.3  | 98.7  |       | 0.0  | 100.0 |       | 0    | 100 |
| Elektrenai   | 0.0  | 0.0  | 52.2  | 0.0  | 0.0  | 45.9  | 0.0   | 0.0  | 97.5  |      | 0.0  | 100.0 | 0.0   | 0.0  | 97.5  |       | 0    | 100 |
| Ignalina     | 66.7 | 38.4 | 88.2  | 57.1 | 18.4 | 90.1  | 50.0  | 6.8  | 93.2  | 0.0  | 0.0  | 97.5  | 100.0 | 2.5  | 100.0 | 100.0 | 40.0 | 100 |
| Jonava       | 70.8 | 60.7 | 79.7  | 82.9 | 67.9 | 92.8  | 40.0  | 5.3  | 85.3  | 0.0  | 0.0  | 52.2  |       | 0.0  | 100.0 | 0     | 0    | 98  |
| Joniskis     | 0.0  | 0.0  | 97.5  | 0.0  | 0.0  | 60.2  | 40.0  | 16.3 | 67.7  |      | 0.0  | 100.0 |       | 0.0  | 100.0 |       | 0    | 100 |
| Jurbarkas    | 0.0  | 0.0  | 33.6  | 62.7 | 49.1 | 75.0  | 76.7  | 69.4 | 83.1  | 0.0  | 0.0  | 52.2  | 0.0   | 0.0  | 97.5  |       | 0    | 100 |
| Kaisiadorys  | 53.6 | 39.7 | 67.0  | 36.8 | 16.3 | 61.6  | 34.6  | 17.2 | 55.7  | 33.3 | 9.9  | 65.1  | 50.0  | 18.7 | 81.3  |       | 0    | 100 |
| Kalvarija    | 0.0  | 0.0  | 97.5  | 0.0  | 0.0  | 70.8  | 0.0   | 0.0  | 84.2  | 0.0  | 0.0  | 97.5  | 0.0   | 0.0  | 97.5  |       | 0    | 100 |
| Kaunas       | 79.2 | 68.5 | 87.6  | 0.0  | 0.0  | 20.6  | 71.8  | 55.1 | 85.0  | 56.5 | 45.3 | 67.2  | 55.6  | 35.3 | 74.5  |       | 0    | 100 |
| Kazlu Ruda   | 0.0  | 0.0  | 52.2  | 0.0  | 0.0  | 52.2  | 0.0   | 0.0  | 52.2  | 25.0 | 0.6  | 80.6  |       | 0.0  | 100.0 |       | 0    | 100 |
| Kedainiai    | 36.8 | 16.3 | 61.6  | 60.8 | 48.8 | 72.0  | 78.9  | 62.7 | 90.4  | 50.0 | 1.3  | 98.7  |       | 0.0  | 100.0 |       | 0    | 100 |
| Kelme        | 0.0  | 0.0  | 60.2  | 0.0  | 0.0  | 97.5  | 50.0  | 1.3  | 98.7  | 33.3 | 0.8  | 90.6  | 0.0   | 0.0  | 84.2  |       | 0    | 100 |
| Klaipeda     | 0.0  | 0.0  | 97.5  |      | 0.0  | 100.0 | 0.0   | 0.0  | 52.2  | 0.0  | 0.0  | 52.2  |       | 0.0  | 100.0 |       | 0    | 100 |
| Kretinga     |      | 0.0  | 100.0 | 0.0  | 0.0  | 97.5  | 0.0   | 0.0  | 41.0  | 0.0  | 0.0  | 70.8  | 0.0   | 0.0  | 84.2  |       | 0    | 100 |
| Kupiskis     | 60.0 | 14.7 | 94.7  | 75.0 | 34.9 | 96.8  | 28.6  | 3.7  | 71.0  |      | 0.0  | 100.0 |       | 0.0  | 100.0 |       | 0    | 100 |
| Lazdijai     | 0.0  | 0.0  | 41.0  | 73.1 | 52.2 | 88.4  | 86.8  | 79.9 | 92.0  | 0.0  | 0.0  | 97.5  | 0.0   | 0.0  | 84.2  |       | 0    | 100 |
| Marijampole  | 0.0  | 0.0  | 30.8  | 0.0  | 0.0  | 19.5  | 47.1  | 23.0 | 72.2  | 69.2 | 38.6 | 90.9  |       | 0.0  | 100.0 |       | 0    | 100 |
| Mazeikiai    | 0.0  | 0.0  | 70.8  | 73.3 | 44.9 | 92.2  | 74.4  | 57.9 | 87.0  | 61.5 | 31.6 | 86.1  | 85.7  | 42.1 | 99.6  |       | 0    | 100 |
| Moletai      | 0.0  | 0.0  | 21.8  | 71.1 | 54.1 | 84.6  | 87.5  | 47.3 | 99.7  | 0.0  | 0.0  | 84.2  | 75.0  | 34.9 | 96.8  |       | 0    | 100 |
| Neringa      |      | 0.0  | 100.0 |      | 0.0  | 100.0 |       | 0.0  | 100.0 | 0.0  | 0.0  | 97.5  |       | 0.0  | 100.0 |       | 0    | 100 |
| Pagegiai     |      | 0.0  | 100.0 | 0.0  | 0.0  | 70.8  | 0.0   | 0.0  | 84.2  | 0.0  | 0.0  | 60.2  |       | 0.0  | 100.0 |       | 0    | 100 |
| Pakruojis    |      | 0.0  | 100.0 | 85.7 | 42.1 | 99.6  | 91.2  | 81.8 | 96.7  | 0.0  | 0.0  | 70.8  | 0.0   | 0.0  | 97.5  |       | 0    | 100 |
| Palanga      |      | 0.0  | 100.0 |      | 0.0  | 100.0 |       | 0.0  | 100.0 |      | 0.0  | 100.0 |       | 0.0  | 100.0 |       | 0    | 100 |
| Panevezys    | 60.9 | 38.5 | 80.3  | 89.3 | 80.1 | 95.3  | 0.0   | 0.0  | 97.5  |      | 0.0  | 100.0 |       | 0.0  | 100.0 |       | 0    | 100 |
| Pasvalys     | 0.0  | 0.0  | 52.2  | 82.5 | 70.9 | 90.9  | 93.5  | 84.3 | 98.2  | 25.0 | 0.6  | 80.6  | 0.0   | 0.0  | 97.5  |       | 0    | 100 |
| Plunge       | 0.0  | 0.0  | 97.5  | 0.0  | 0.0  | 97.5  | 0.0   | 0.0  | 70.8  | 0.0  | 0.0  | 84.2  | 47.6  | 25.7 | 70.2  |       | 0    | 100 |
| Prienai      | 0.0  | 0.0  | 97.5  | 0.0  | 0.0  | 60.2  | 45.5  | 16.7 | 76.6  | 50.0 | 11.8 | 88.2  |       | 0.0  | 100.0 |       | 0    | 100 |
| Radviliskis  | 0.0  | 0.0  | 84.2  | 0.0  | 0.0  | 36.9  | 74.5  | 59.7 | 86.1  | 33.3 | 0.8  | 90.6  | 0.0   | 0.0  | 97.5  |       | 0    | 100 |
| Raseiniai    | 75.0 | 19.4 | 99.4  | 73.7 | 48.8 | 90.9  | 62.9  | 44.9 | 78.5  | 16.7 | 0.4  | 64.1  | 0.0   | 0.0  | 97.5  |       | 0    | 100 |
| Rietavas     | 0.0  | 0.0  | 84.2  | 0.0  | 0.0  | 97.5  |       | 0.0  | 100.0 | 0.0  | 0.0  | 97.5  |       | 0.0  | 100.0 |       | 0    | 100 |
| Rokiskis     | 0.0  | 0.0  | 70.8  | 80.0 | 61.4 | 92.3  | 91.7  | 61.5 | 99.8  | 0.0  | 0.0  | 97.5  |       | 0.0  | 100.0 |       | 0    | 100 |

|             |      |      |       |      |      |       |       |      |       |       |      |       |      |      |       |   |   |     |
|-------------|------|------|-------|------|------|-------|-------|------|-------|-------|------|-------|------|------|-------|---|---|-----|
| Sakiai      | 0.0  | 0.0  | 97.5  | 0.0  | 0.0  | 84.2  | 100.0 | 29.2 | 100.0 | 94.4  | 72.7 | 99.9  | 0.0  | 0.0  | 84.2  |   | 0 | 100 |
| Salcininkai | 31.3 | 11.0 | 58.7  | 68.8 | 41.3 | 89.0  | 16.7  | 0.4  | 64.1  | 0.0   | 0.0  | 84.2  | 0.0  | 0.0  | 97.5  |   | 0 | 100 |
| Siauliai    | 0.0  | 0.0  | 70.8  | 0.0  | 0.0  | 97.5  | 65.8  | 48.6 | 80.4  | 100.0 | 63.1 | 100.0 | 0.0  | 0.0  | 70.8  |   | 0 | 100 |
| Silale      | 0.0  | 0.0  | 97.5  | 0.0  | 0.0  | 97.5  | 0.0   | 0.0  | 97.5  | 0.0   | 0.0  | 97.5  | 0.0  | 0.0  | 97.5  |   | 0 | 100 |
| Silute      | 0.0  | 0.0  | 97.5  |      | 0.0  | 100.0 | 33.3  | 0.8  | 90.6  | 0.0   | 0.0  | 84.2  |      | 0.0  | 100.0 | 0 | 0 | 84  |
| Sirvintos   | 0.0  | 0.0  | 36.9  | 45.8 | 25.6 | 67.2  | 77.1  | 62.7 | 88.0  |       | 0.0  | 100.0 | 0.0  | 0.0  | 84.2  |   | 0 | 100 |
| Skuodas     | 0.0  | 0.0  | 84.2  | 0.0  | 0.0  | 70.8  | 0.0   | 0.0  | 84.2  | 50.0  | 1.3  | 98.7  | 0.0  | 0.0  | 84.2  |   | 0 | 100 |
| Svencionys  | 0.0  | 0.0  | 97.5  | 0.0  | 0.0  | 97.5  | 33.3  | 0.8  | 90.6  | 75.0  | 34.9 | 96.8  | 62.5 | 35.4 | 84.8  |   | 0 | 100 |
| Taurage     | 0.0  | 0.0  | 70.8  | 0.0  | 0.0  | 36.9  | 0.0   | 0.0  | 97.5  | 0.0   | 0.0  | 60.2  | 0.0  | 0.0  | 97.5  |   | 0 | 100 |
| Telsiai     | 0.0  | 0.0  | 24.7  | 0.0  | 0.0  | 41.0  | 44.0  | 24.4 | 65.1  | 54.5  | 23.4 | 83.3  | 25.0 | 3.2  | 65.1  |   | 0 | 100 |
| Trakai      | 25.0 | 0.6  | 80.6  | 20.0 | 0.5  | 71.6  | 66.7  | 9.4  | 99.2  | 0.0   | 0.0  | 84.2  | 0.0  | 0.0  | 97.5  | 0 | 0 | 84  |
| Ukmerge     | 7.4  | 0.9  | 24.3  | 87.4 | 83.3 | 90.8  | 84.9  | 77.8 | 90.4  | 33.3  | 0.8  | 90.6  | 28.6 | 3.7  | 71.0  |   | 0 | 100 |
| Utena       | 25.0 | 3.2  | 65.1  | 79.5 | 64.7 | 90.2  | 77.8  | 40.0 | 97.2  | 100.0 | 2.5  | 100.0 |      | 0.0  | 100.0 |   | 0 | 100 |
| Varena      | 0.0  | 0.0  | 45.9  | 94.0 | 85.4 | 98.3  | 63.6  | 40.7 | 82.8  |       | 0.0  | 100.0 |      | 0.0  | 100.0 |   | 0 | 100 |
| Vilkaviskis | 0.0  | 0.0  | 70.8  | 0.0  | 0.0  | 60.2  | 0.0   | 0.0  | 36.9  | 0.0   | 0.0  | 60.2  |      | 0.0  | 100.0 |   | 0 | 100 |
| Vilnius     | 4.5  | 0.1  | 22.8  | 7.1  | 0.2  | 33.9  | 45.5  | 24.4 | 67.8  | 60.0  | 26.2 | 87.8  | 66.7 | 9.4  | 99.2  |   | 0 | 100 |
| Visaginas   |      | 0.0  | 100.0 |      | 0.0  | 100.0 |       | 0.0  | 100.0 |       | 0.0  | 100.0 |      | 0.0  | 100.0 |   | 0 | 100 |
| Zarasai     | 62.5 | 24.5 | 91.5  | 78.7 | 66.3 | 88.1  | 88.9  | 73.9 | 96.9  | 33.3  | 0.8  | 90.6  | 33.3 | 0.8  | 90.6  |   | 0 | 100 |

**Table S5.** Seroprevalence in hunted wild boar including the 95% confidence intervals on municipality level in the years 2016 - 2021 (only the first 4 months for 2021).  
Blank fields indicate lack of data in the respective municipality.

|              | 2016         |               |               | 2017         |               |               | 2018         |               |               | 2019         |               |               | 2020         |               |               | 2021         |               |               |
|--------------|--------------|---------------|---------------|--------------|---------------|---------------|--------------|---------------|---------------|--------------|---------------|---------------|--------------|---------------|---------------|--------------|---------------|---------------|
| District     | Prev<br>in % | Lo CI<br>in % | Up CI<br>in % | Prev<br>in % | Lo CI<br>in % | Up CI<br>in % | Prev<br>in % | Lo CI<br>in % | Up CI<br>in % | Prev<br>in % | Lo CI<br>in % | Up CI<br>in % | Prev<br>in % | Lo CI<br>in % | Up CI<br>in % | Prev<br>in % | Lo CI<br>in % | Up CI<br>in % |
| Akmene       | 0            | 0             | 5.9           | 0            | 0             | 24.7          | 2.8          | 0.8           | 7             | 28.1         | 13.7          | 46.7          | 16.7         | 4.7           | 37.4          | 0.0          | 0.0           | 33.6          |
| Alytus       | 0.2          | 0             | 1.1           | 0            | 0             | 0.8           | 2.6          | 1             | 5.5           | 1.6          | 0.2           | 5.8           | 0.0          | 0.0           | 2.1           | 0.0          | 0.0           | 4.7           |
| Anyksciai    | 0.6          | 0.3           | 1.2           | 1.5          | 0.6           | 2.9           | 19.4         | 11.1          | 30.5          | 7.3          | 3.2           | 14.0          | 2.9          | 1.2           | 5.9           | 1.2          | 0.0           | 6.3           |
| Birstonas    | 0            | 0             | 7.3           | 0            | 0             | 7             | 2            | 0.1           | 10.6          | 0.0          | 0.0           | 33.6          | 0.0          | 0.0           | 60.2          |              | 0.0           | 100.0         |
| Birzai       | 1.2          | 0.5           | 2.5           | 2.8          | 1.2           | 5.4           | 3.7          | 0.8           | 10.3          | 4.4          | 1.2           | 11.0          | 2.1          | 0.6           | 5.2           | 0.0          | 0.0           | 4.1           |
| Druskininkai | 0            | 0             | 8.4           | 0            | 0             | 5.6           | 0            | 0             | 24.7          | 0.0          | 0.0           | 52.2          | 0.0          | 0.0           | 70.8          | 0.0          | 0.0           | 52.2          |
| Elektrenai   | 0            | 0             | 0.8           | 0            | 0             | 0.9           | 1.4          | 0.4           | 3.4           | 1.1          | 0.0           | 6.2           | 0.9          | 0.0           | 5.0           | 0.0          | 0.0           | 12.8          |
| Ignalina     | 2.3          | 0.5           | 6.6           | 0.9          | 0             | 5             | 2            | 0.4           | 5.8           | 2.3          | 0.5           | 6.5           | 0.6          | 0.0           | 3.1           | 0.0          | 0.0           | 5.7           |
| Jonava       | 1.2          | 0.5           | 2.4           | 3.1          | 1.3           | 6.4           | 14.8         | 6.6           | 27.1          | 4.6          | 1.0           | 12.9          | 1.6          | 0.2           | 5.6           | 0.0          | 0.0           | 16.8          |

|             |     |     |      |     |     |      |      |      |      |      |     |      |      |     |       |     |     |       |
|-------------|-----|-----|------|-----|-----|------|------|------|------|------|-----|------|------|-----|-------|-----|-----|-------|
| Joniskis    | 0   | 0   | 3    | 0   | 0   | 5.2  | 3.7  | 1.5  | 7.5  | 12.2 | 5.7 | 21.8 | 4.8  | 1.0 | 13.3  | 6.7 | 0.2 | 31.9  |
| Jurbarkas   | 0   | 0   | 3.9  | 0.4 | 0   | 2    | 0.9  | 0.2  | 2.3  | 0.9  | 0.2 | 2.7  | 0.8  | 0.2 | 2.3   | 0.0 | 0.0 | 4.6   |
| Kaisiadorys | 0.4 | 0.1 | 1.1  | 0.8 | 0.3 | 1.9  | 2.2  | 1.1  | 3.8  | 0.9  | 0.2 | 2.7  | 1.2  | 0.3 | 3.5   | 2.1 | 0.1 | 11.3  |
| Kalvarija   | 0   | 0   | 5.5  | 0   | 0   | 2.5  | 0    | 0    | 2    | 0.0  | 0.0 | 2.1  | 0.0  | 0.0 | 2.0   | 0.0 | 0.0 | 6.5   |
| Kaunas      | 0.3 | 0   | 1.1  | 0.2 | 0   | 0.9  | 0.6  | 0.2  | 1.4  | 1.2  | 0.3 | 3.2  | 3.5  | 1.3 | 7.5   | 2.3 | 0.1 | 12.0  |
| Kazlu Ruda  | 0   | 0   | 5.2  | 0   | 0   | 2.1  | 0    | 0    | 1.2  | 1.1  | 0.0 | 5.7  | 14.3 | 1.8 | 42.8  | 0.0 | 0.0 | 41.0  |
| Kedainiai   | 0.2 | 0   | 0.5  | 0.6 | 0.3 | 1.1  | 2.3  | 1.2  | 3.9  | 4.3  | 2.4 | 7.2  | 0.9  | 0.2 | 2.5   | 2.4 | 0.3 | 8.2   |
| Kelme       | 0   | 0   | 3.2  | 0   | 0   | 2.5  | 0    | 0    | 0.7  | 0.6  | 0.2 | 1.6  | 0.7  | 0.2 | 1.7   | 1.6 | 0.3 | 4.7   |
| Klaipeda    | 0   | 0   | 10.6 | 0   | 0   | 10.6 | 0    | 0    | 20.6 | 0.0  | 0.0 | 2.2  | 0.2  | 0.0 | 1.3   | 0.8 | 0.0 | 4.6   |
| Kretinga    | 0   | 0   | 5.4  | 0   | 0   | 4.2  | 0    | 0    | 5.4  | 0.0  | 0.0 | 5.3  | 0.5  | 0.0 | 2.9   | 0.0 | 0.0 | 2.7   |
| Kupiskis    | 0.3 | 0   | 1.7  | 1.5 | 0.2 | 5.3  | 11.1 | 4.6  | 21.6 | 13.9 | 4.7 | 29.5 | 0.0  | 0.0 | 5.1   | 0.0 | 0.0 | 14.2  |
| Lazdijai    | 0   | 0   | 0.8  | 0.2 | 0   | 1.2  | 0.9  | 0.1  | 3.1  | 1.7  | 0.2 | 6.1  | 0.0  | 0.0 | 3.5   | 0.0 | 0.0 | 13.2  |
| Marijampole | 0   | 0   | 3.2  | 0   | 0   | 1.6  | 0.3  | 0    | 1.8  | 0.0  | 0.0 | 3.0  | 0.0  | 0.0 | 8.8   | 0.0 | 0.0 | 33.6  |
| Mazeikiai   | 0   | 0   | 4.1  | 0   | 0   | 6.2  | 0.8  | 0.2  | 2    | 3.2  | 1.6 | 5.7  | 1.7  | 0.2 | 6.0   | 5.6 | 0.1 | 27.3  |
| Moletai     | 0.3 | 0   | 1.2  | 0   | 0   | 0.6  | 1.5  | 0.6  | 3.2  | 2.7  | 1.2 | 5.3  | 3.6  | 1.5 | 7.3   | 2.0 | 0.1 | 10.9  |
| Neringa     | 0   | 0   | 97.5 | 0   | 0   | 97.5 |      | 0    | 100  | 0.0  | 0.0 | 3.9  | 0.0  | 0.0 | 26.5  |     | 0.0 | 100.0 |
| Pagegiai    | 0   | 0   | 6    | 0   | 0   | 5.4  | 0    | 0    | 4.7  | 1.3  | 0.2 | 4.6  | 0.0  | 0.0 | 2.3   | 0.0 | 0.0 | 11.6  |
| Pakruojis   | 0   | 0   | 11.9 | 0.6 | 0   | 3.3  | 4.2  | 1.8  | 8.1  | 0.0  | 0.0 | 5.3  | 1.8  | 0.0 | 9.6   | 5.3 | 0.1 | 26.0  |
| Palanga     |     | 0   | 100  | 0   | 0   | 84.2 | 0    | 0    | 97.5 | 0.0  | 0.0 | 84.2 |      | 0.0 | 100.0 |     | 0.0 | 100.0 |
| Panevezys   | 0   | 0   | 0.5  | 0.7 | 0.3 | 1.6  | 17.4 | 9.3  | 28.4 | 12.1 | 5.4 | 22.5 | 4.7  | 1.3 | 11.6  | 0.0 | 0.0 | 15.4  |
| Pasvalys    | 2.4 | 0.5 | 7    | 1.9 | 0.5 | 4.9  | 10   | 4.4  | 18.8 | 4.3  | 0.9 | 12.0 | 2.1  | 0.3 | 7.3   | 0.0 | 0.0 | 8.8   |
| Plunge      | 0   | 0   | 4.5  | 0   | 0   | 6.3  | 0    | 0    | 2.1  | 0.0  | 0.0 | 0.6  | 2.9  | 1.5 | 4.9   | 5.0 | 1.4 | 12.3  |
| Prienai     | 0   | 0   | 0.5  | 0   | 0   | 0.5  | 0.6  | 0.2  | 1.5  | 2.3  | 0.6 | 5.8  | 5.2  | 1.7 | 11.6  | 0.0 | 0.0 | 26.5  |
| Radviliskis | 0   | 0   | 4.2  | 0.3 | 0   | 1.8  | 0.5  | 0.1  | 1.4  | 0.7  | 0.1 | 2.5  | 0.3  | 0.0 | 1.7   | 0.0 | 0.0 | 3.3   |
| Raseiniai   | 0   | 0   | 4.1  | 0   | 0   | 2.3  | 0.4  | 0    | 1.4  | 0.0  | 0.0 | 1.1  | 1.1  | 0.2 | 3.1   | 0.0 | 0.0 | 3.7   |
| Rietavas    | 1.7 | 0   | 9.1  | 0   | 0   | 28.5 | 0    | 0    | 5.8  | 0.5  | 0.0 | 2.5  | 0.0  | 0.0 | 1.1   | 1.6 | 0.0 | 8.4   |
| Rokiskis    | 0.4 | 0   | 1.5  | 0   | 0   | 1.5  | 12.7 | 6    | 22.7 | 4.6  | 1.5 | 10.5 | 0.0  | 0.0 | 2.9   | 1.3 | 0.0 | 7.0   |
| Sakiai      | 0   | 0   | 17.6 | 0.8 | 0   | 4.3  | 0    | 0    | 0.9  | 0.4  | 0.0 | 2.2  | 0.0  | 0.0 | 2.7   | 0.0 | 0.0 | 5.3   |
| Salcininkai | 2.6 | 1   | 5.6  | 2.2 | 0.5 | 6.4  | 0.8  | 0    | 4.2  | 2.1  | 0.4 | 6.1  | 0.6  | 0.0 | 3.5   | 2.8 | 0.1 | 14.5  |
| Siauliai    | 0   | 0   | 3    | 0   | 0   | 2.8  | 4.4  | 2.4  | 7.3  | 9.5  | 6.0 | 14.0 | 1.2  | 0.2 | 3.4   | 9.6 | 4.3 | 18.1  |
| Silale      | 0   | 0   | 5.9  | 0   | 0   | 10   | 0    | 0    | 1.4  | 0.2  | 0.0 | 1.2  | 0.0  | 0.0 | 0.9   | 0.7 | 0.0 | 4.0   |
| Silute      | 0   | 0   | 8.2  | 0   | 0   | 16.1 | 0    | 0    | 3.2  | 0.4  | 0.0 | 2.0  | 0.0  | 0.0 | 0.9   | 0.0 | 0.0 | 3.2   |
| Sirvintos   | 0   | 0   | 0.6  | 0.6 | 0.1 | 1.6  | 19.8 | 11.7 | 30.1 | 3.5  | 0.7 | 9.9  | 0.7  | 0.0 | 4.0   | 0.0 | 0.0 | 10.3  |
| Skuodas     | 0   | 0   | 5.1  | 0   | 0   | 3.8  | 0    | 0    | 4.7  | 0.0  | 0.0 | 2.4  | 0.0  | 0.0 | 3.9   | 0.0 | 0.0 | 14.2  |
| Svencionys  | 0   | 0   | 2.2  | 0   | 0   | 2.5  | 0    | 0    | 2.1  | 2.0  | 0.5 | 5.0  | 1.9  | 0.4 | 5.4   | 2.7 | 0.1 | 14.2  |

|             |     |     |     |     |     |      |      |     |      |      |     |       |     |     |       |     |     |      |
|-------------|-----|-----|-----|-----|-----|------|------|-----|------|------|-----|-------|-----|-----|-------|-----|-----|------|
| Taurage     | 0   | 0   | 4.5 | 0   | 0   | 8.8  | 0    | 0   | 1.5  | 0.0  | 0.0 | 0.8   | 0.2 | 0.0 | 1.3   | 0.9 | 0.0 | 4.8  |
| Telsiai     | 0   | 0   | 3   | 0   | 0   | 2.9  | 0.2  | 0   | 0.9  | 1.6  | 0.9 | 2.9   | 2.4 | 1.3 | 4.0   | 1.4 | 0.3 | 4.2  |
| Trakai      | 0.2 | 0   | 1.1 | 0.2 | 0   | 0.9  | 0.6  | 0.1 | 1.8  | 1.9  | 0.7 | 4.1   | 0.5 | 0.1 | 1.9   | 2.4 | 0.3 | 8.5  |
| Ukmerge     | 0   | 0   | 0.5 | 0.9 | 0.4 | 1.8  | 16.2 | 8.7 | 26.6 | 12.5 | 5.2 | 24.1  | 7.8 | 3.6 | 14.2  | 2.7 | 0.1 | 14.2 |
| Utena       | 0.1 | 0   | 0.8 | 0.6 | 0.2 | 1.6  | 2.1  | 0.8 | 4.5  | 4.8  | 2.1 | 9.2   | 6.8 | 3.0 | 12.9  | 0.0 | 0.0 | 14.2 |
| Varena      | 1.3 | 0.4 | 3.3 | 0.6 | 0.1 | 2.3  | 3.3  | 1.2 | 7    | 2.5  | 0.5 | 7.1   | 1.1 | 0.2 | 3.2   | 0.0 | 0.0 | 5.9  |
| Vilkaviskis | 0   | 0   | 4.9 | 0   | 0   | 1.9  | 0    | 0   | 1.6  | 0.0  | 0.0 | 1.7   | 0.5 | 0.0 | 2.9   | 0.0 | 0.0 | 9.7  |
| Vilnius     | 0.3 | 0   | 1.1 | 0.3 | 0   | 1    | 1.2  | 0.5 | 2.4  | 3.4  | 1.6 | 6.1   | 4.7 | 2.5 | 8.1   | 0.0 | 0.0 | 4.9  |
| Visaginas   |     | 0   | 100 | 25  | 0.6 | 80.6 |      | 0   | 100  |      | 0.0 | 100.0 |     | 0.0 | 100.0 | 0.0 | 0.0 | 97.5 |
| Zarasai     | 0   | 0   | 0.7 | 0.8 | 0.2 | 2.2  | 1.3  | 0.2 | 4.7  | 3.2  | 0.7 | 9.1   | 4.9 | 1.8 | 10.4  | 0.0 | 0.0 | 6.7  |

**Table S6.** Median of estimated number of wild boar/km<sup>2</sup> based on sightings and snow track per hunting year and the results of the Mann–Whitney U test. Significant differences between the hunting seasons are highlighted.

| Hunting season | Median of estimated number of wild boar/km <sup>2</sup> | Hunting season |         |         |         |         |         |
|----------------|---------------------------------------------------------|----------------|---------|---------|---------|---------|---------|
|                |                                                         | 2014/15        | 2015/16 | 2016/17 | 2017/18 | 2018/19 | 2019/20 |
|                |                                                         | P-value        |         |         |         |         |         |
| 2013/14        | 0.33                                                    | 1              | 1       | 1       | 0.32    | 0.01    | 0.04    |
| 2014/15        | 0.40                                                    |                | 0.35    | 0.20    | 0.01    | <0.001  | <0.001  |
| 2015/16        | 0.28                                                    |                |         | 1       | 1       | 0.02    | 0.15    |
| 2016/17        | 0.29                                                    |                |         |         | 1       | 0.04    | 0.15    |
| 2017/18        | 0.20                                                    |                |         |         |         | 1       | 1       |
| 2018/19        | 0.14                                                    |                |         |         |         |         | 1       |
| 2019/20        | 0.17                                                    |                |         |         |         |         |         |

**Table S7.** Median of the estimated number of wild boar/km<sup>2</sup> based on hunting bag per year and the results of the Mann–Whitney U test. Significant differences between the hunting seasons are highlighted.

| Year | Median of hunted number of wild boar/km <sup>2</sup> | Year    |      |        |        |
|------|------------------------------------------------------|---------|------|--------|--------|
|      |                                                      | 2017    | 2018 | 2019   | 2020   |
|      |                                                      | P-value |      |        |        |
| 2016 | 0.53                                                 | 1       | 0.07 | <0.001 | <0.001 |
| 2017 | 0.50                                                 |         | 0.20 | <0.001 | <0.001 |
| 2018 | 0.25                                                 |         |      | 0.26   | 0.01   |
| 2019 | 0.13                                                 |         |      |        | 1      |
| 2020 | 0.09                                                 |         |      |        |        |
